# Supplementary material for: Accumulation of Non-Pathological Liver Fat Is Associated with the Loss of Glyoxalase I Activity in Humans
Source: MDPI journal article supplement (doi:10.3390/metabo14040209), 2024-04-07

# Supplementary Table(s):

**Supplementary Table 1.** Sex differences in anthropometric characteristics, biochemical assessment of the liver glyoxalase system, liver dicarbonyls and glycation and oxidation biomarkers of the study cohort.

| Parameter                                  | Male        | Female       | P-value |
|--------------------------------------------|-------------|--------------|---------|
| No. of Individuals                         | 25          | 5            | <0.001  |
| Age (Years)                                | 63 ± 11     | 62 ± 3       | 0.33    |
| BMI (kg/m <sup>2</sup> )                   | 26.8 ± 3.19 | 27.8 ± 4.49  | 0.83    |
| TAG (% of Liver Tissue)                    | 3.12 ± 2.72 | 4.46 ± 4.58  | 0.36    |
| HOMA-IR                                    | 3.77 ± 4.59 | 1.73 ± 0.624 | 0.67    |
| <b>Liver Glyoxalase System</b>             |             |              |         |
| Glo1 mRNA (Rps13 mRNA Normalized)          | 0.42 ± 0.14 | 0.36 ± 0.05  | 0.21    |
| Glo1 Protein Expression (Actin Normalized) | 0.99 ± 0.28 | 0.72 ± 0.10  | 0.02    |
| Glo1 Activity (mU/mg)                      | 3.79 ± 0.94 | 2.73 ± 1.17  | 0.04    |
| Glo2 mRNA (Rps13 mRNA Normalized)          | 0.05 ± 0.02 | 0.05 ± 0.01  | 0.91    |
| Glo2 Protein Expression (Actin Normalized) | 1.13 ± 0.22 | 1.09 ± 0.25  | 0.87    |
| Glo2 Activity (mU/mg)                      | 9.01 ± 1.48 | 7.63 ± 1.64  | 0.17    |
| <b>Liver Dicarbonyls (pmol/mg)</b>         |             |              |         |
| Glyoxal                                    | 8.09 ± 4.76 | 9.43 ± 6.04  | 0.59    |
| Methylglyoxal                              | 5.16 ± 2.53 | 6.10 ± 3.22  | 0.48    |
| 3DG                                        | 0.33 ± 0.11 | 0.37 ± 0.08  | 0.36    |
| <b>Liver Glycation Biomarkers</b>          |             |              |         |
| MG-H1 (mmol/mol Arg)                       | 1.17 ± 0.35 | 1.75 ± 0.73  | 0.05    |
| G-H1 (mmol/mol Arg)                        | 0.25 ± 0.14 | 0.25 ± 0.13  | 0.83    |
| CEL (mmol/mol Lys)                         | 1.36 ± 1.72 | 1.20 ± 0.80  | 0.87    |
| MOLD (mmol/mol Lys)                        | 0.22 ± 0.06 | 0.31 ± 0.08  | 0.03    |
| Fructosyl-lysine (mmol/mol Lys)            | 10.1 ± 2.88 | 14.5 ± 7.84  | 0.15    |
| <b>Liver Oxidation Biomarkers</b>          |             |              |         |
| Methionine Sulphoxide (mmol/mol Met)       | 31.7 ± 16.7 | 55.1 ± 22.0  | 0.009   |
| Dityrosine (mmol/mol Tyr)                  | 0.09 ± 0.06 | 0.13 ± 0.14  | >0.99   |

**Supplementary Figure 1A.** Full blot for Glyoxalase 1 (Glo1) Protein Analysis. Region taken for densitometer analysis are shown in red.

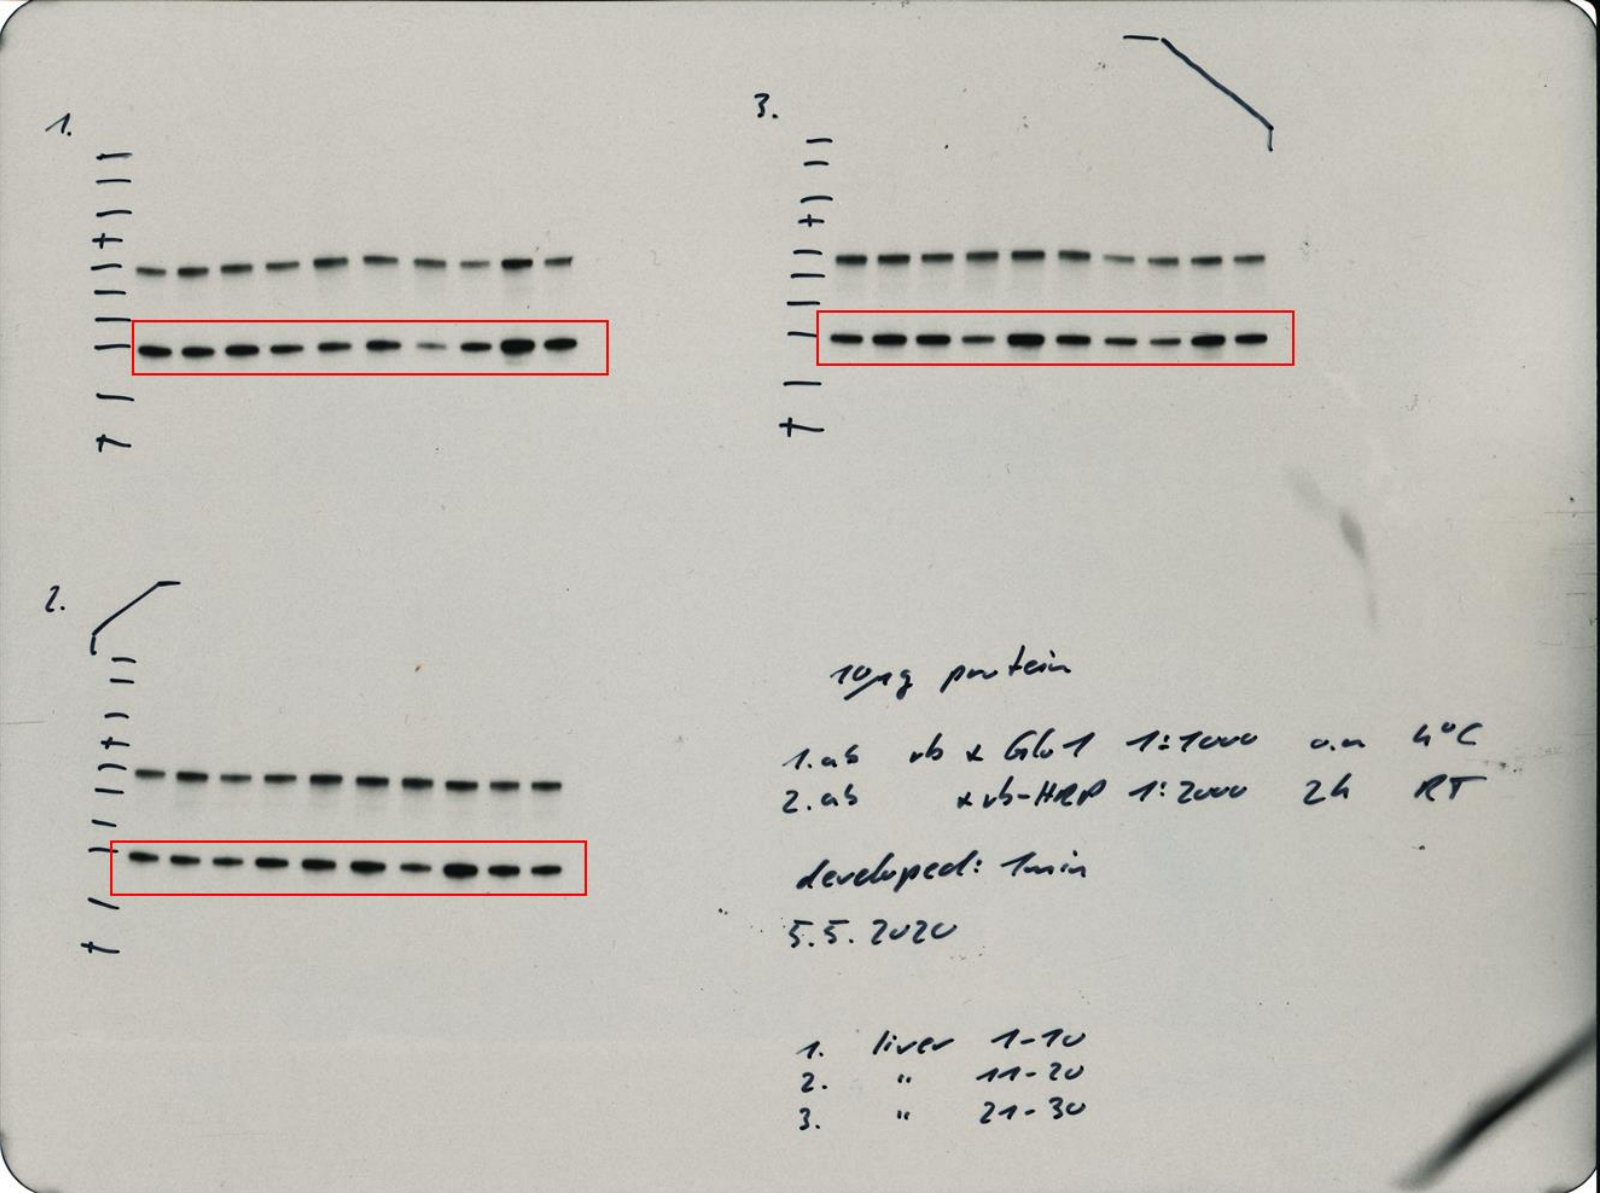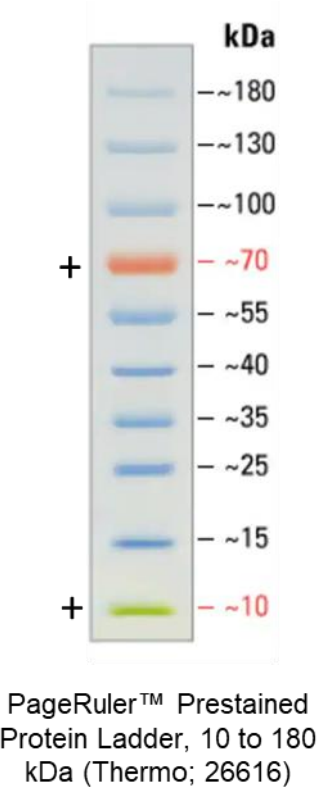

**Supplementary Figure 1B.** Full blot for Actin Protein Analysis. Region taken for densitometer analysis are shown in red.

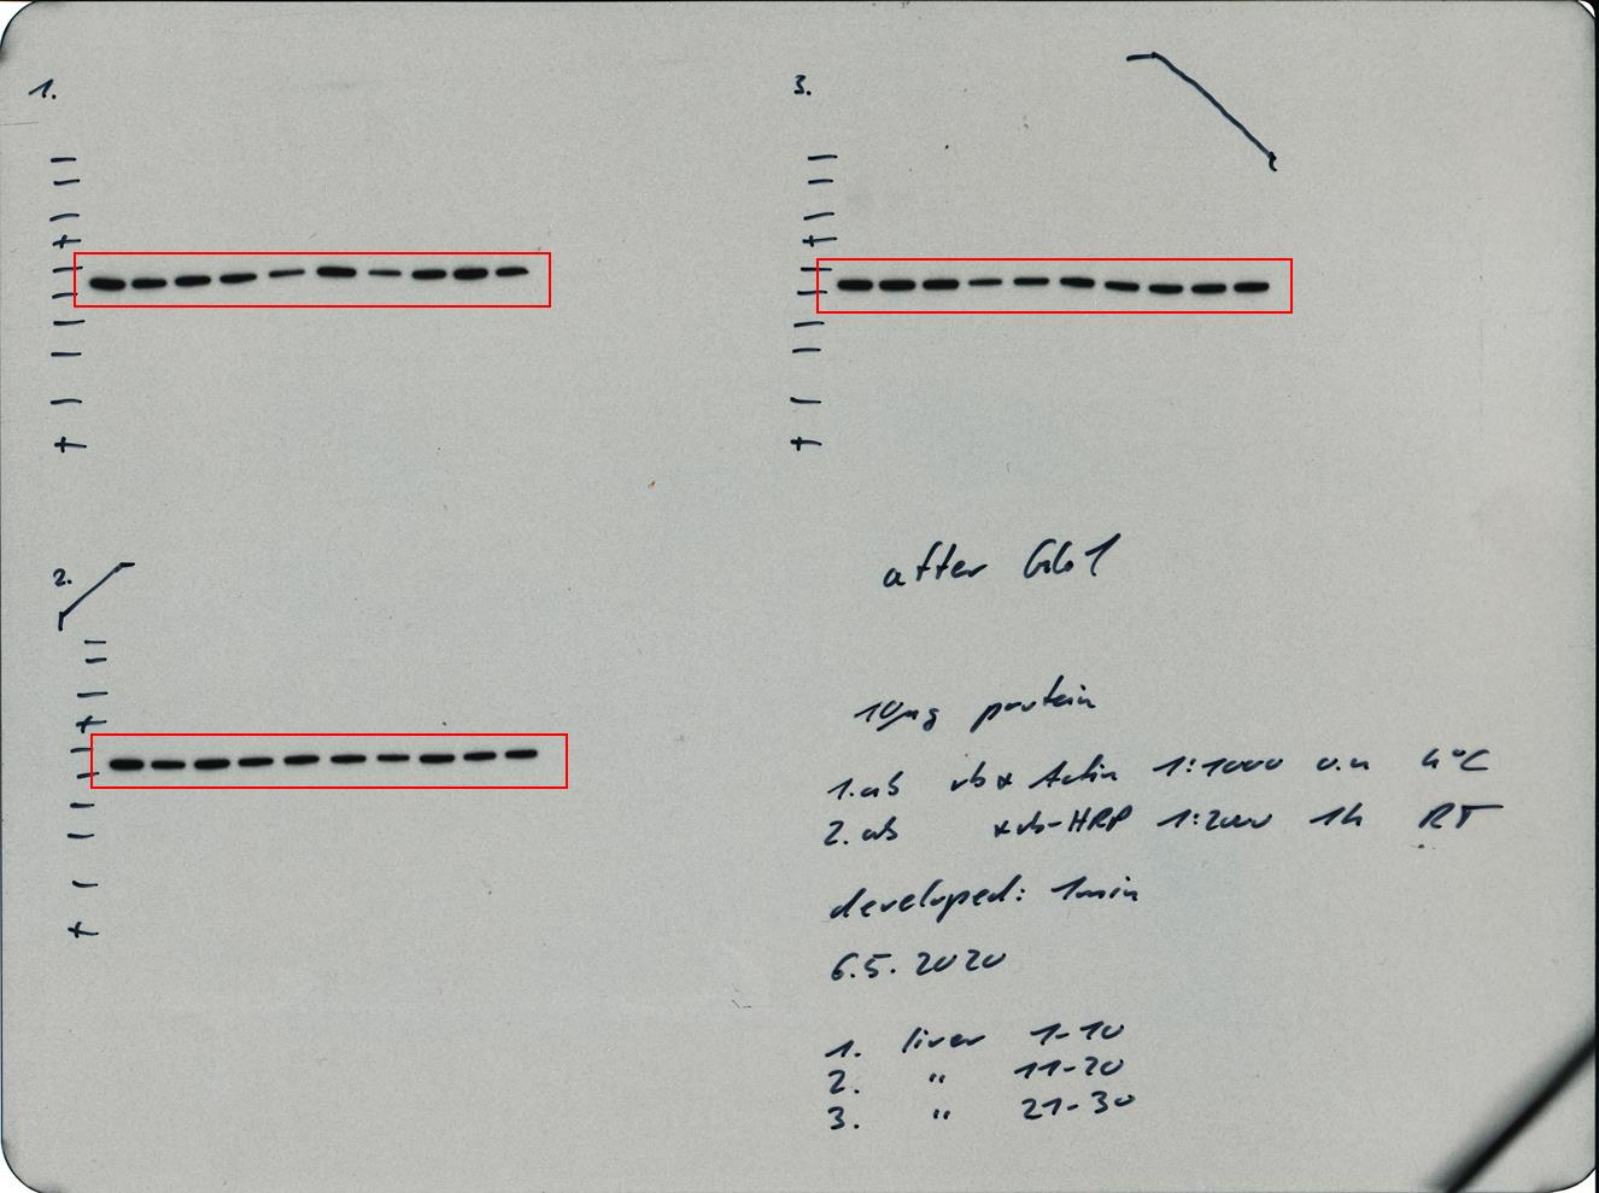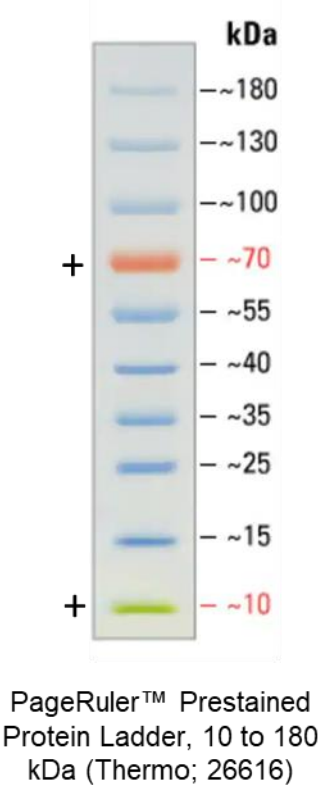

**Supplementary Figure 1C.** Full blot for Glyoxalase 2 (Glo2) Protein Analysis. Region taken for densitometer analysis are shown in red.

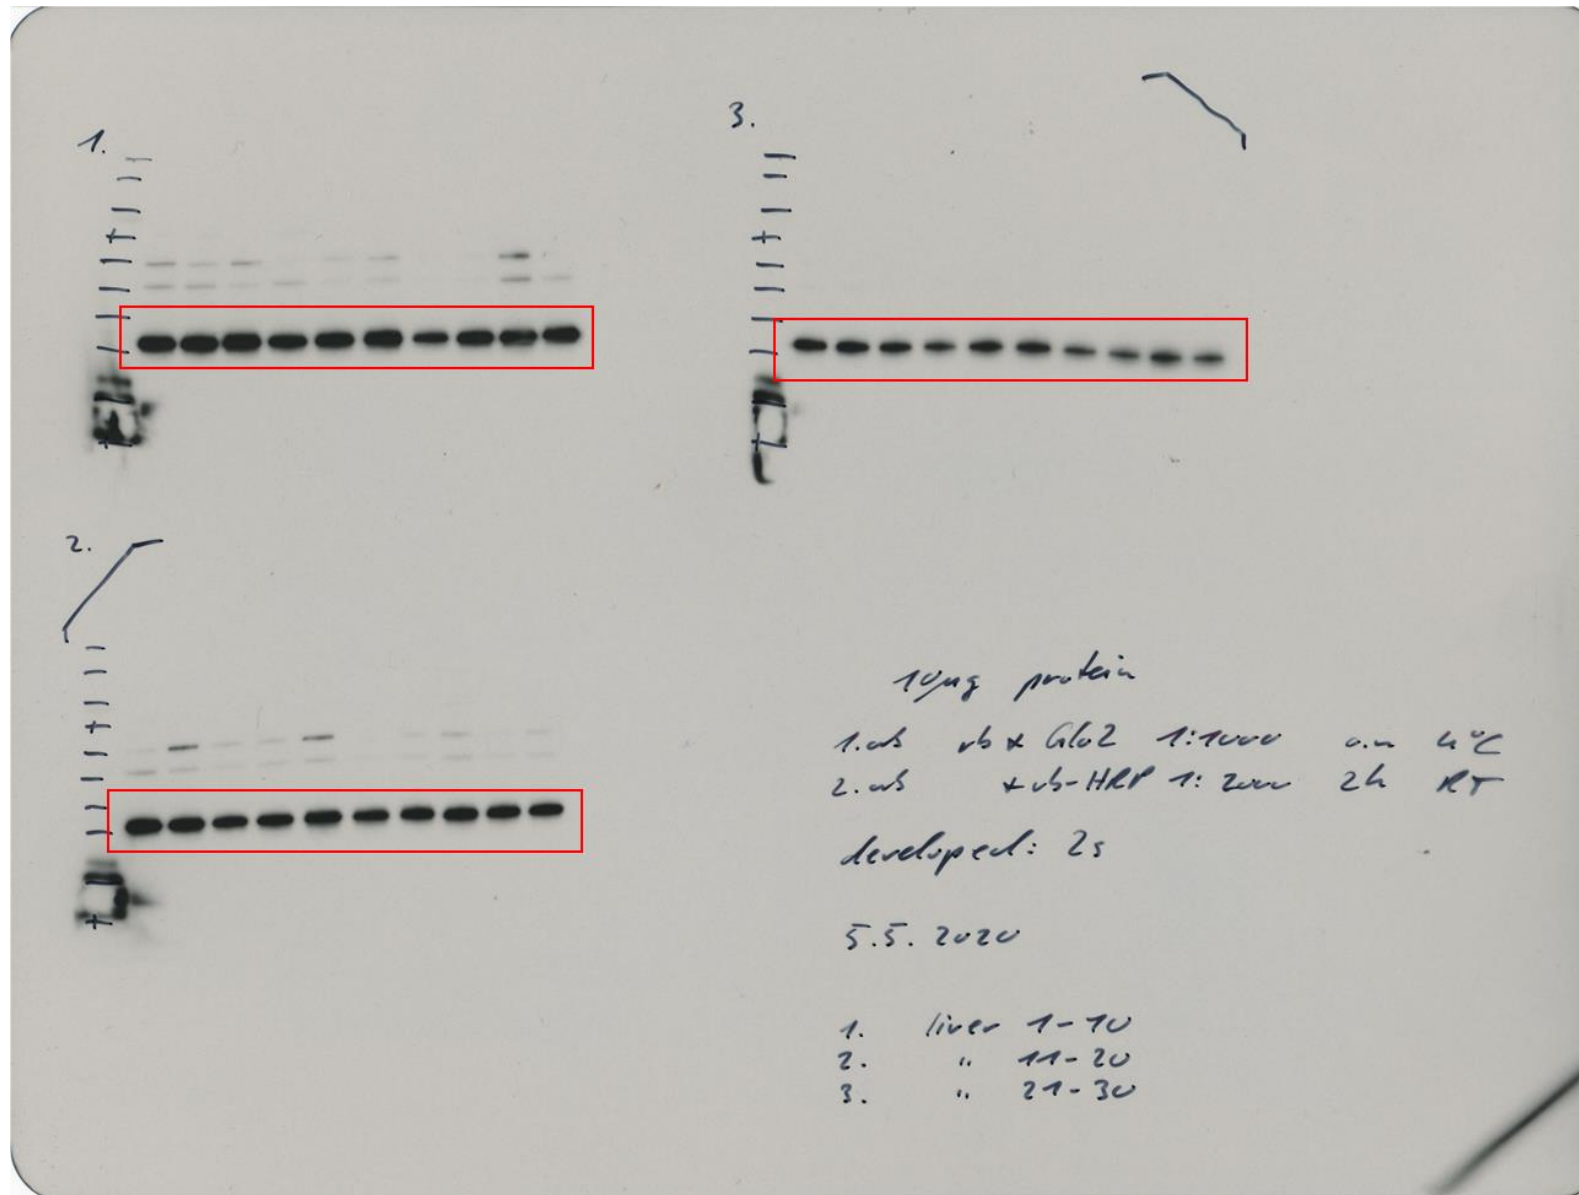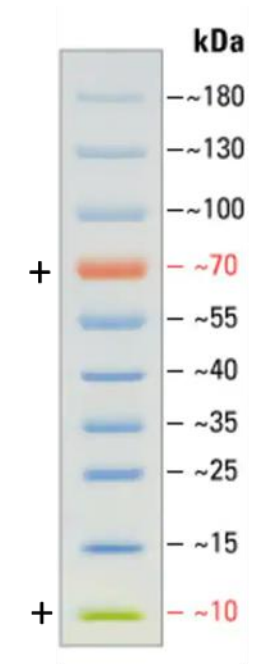

PageRuler™ Prestained  
Protein Ladder, 10 to 180  
kDa (Thermo; 26616)



**Supplementary Figure 1D.** Full blot for Actin Protein Analysis. Region taken for densitometer analysis are shown in red.

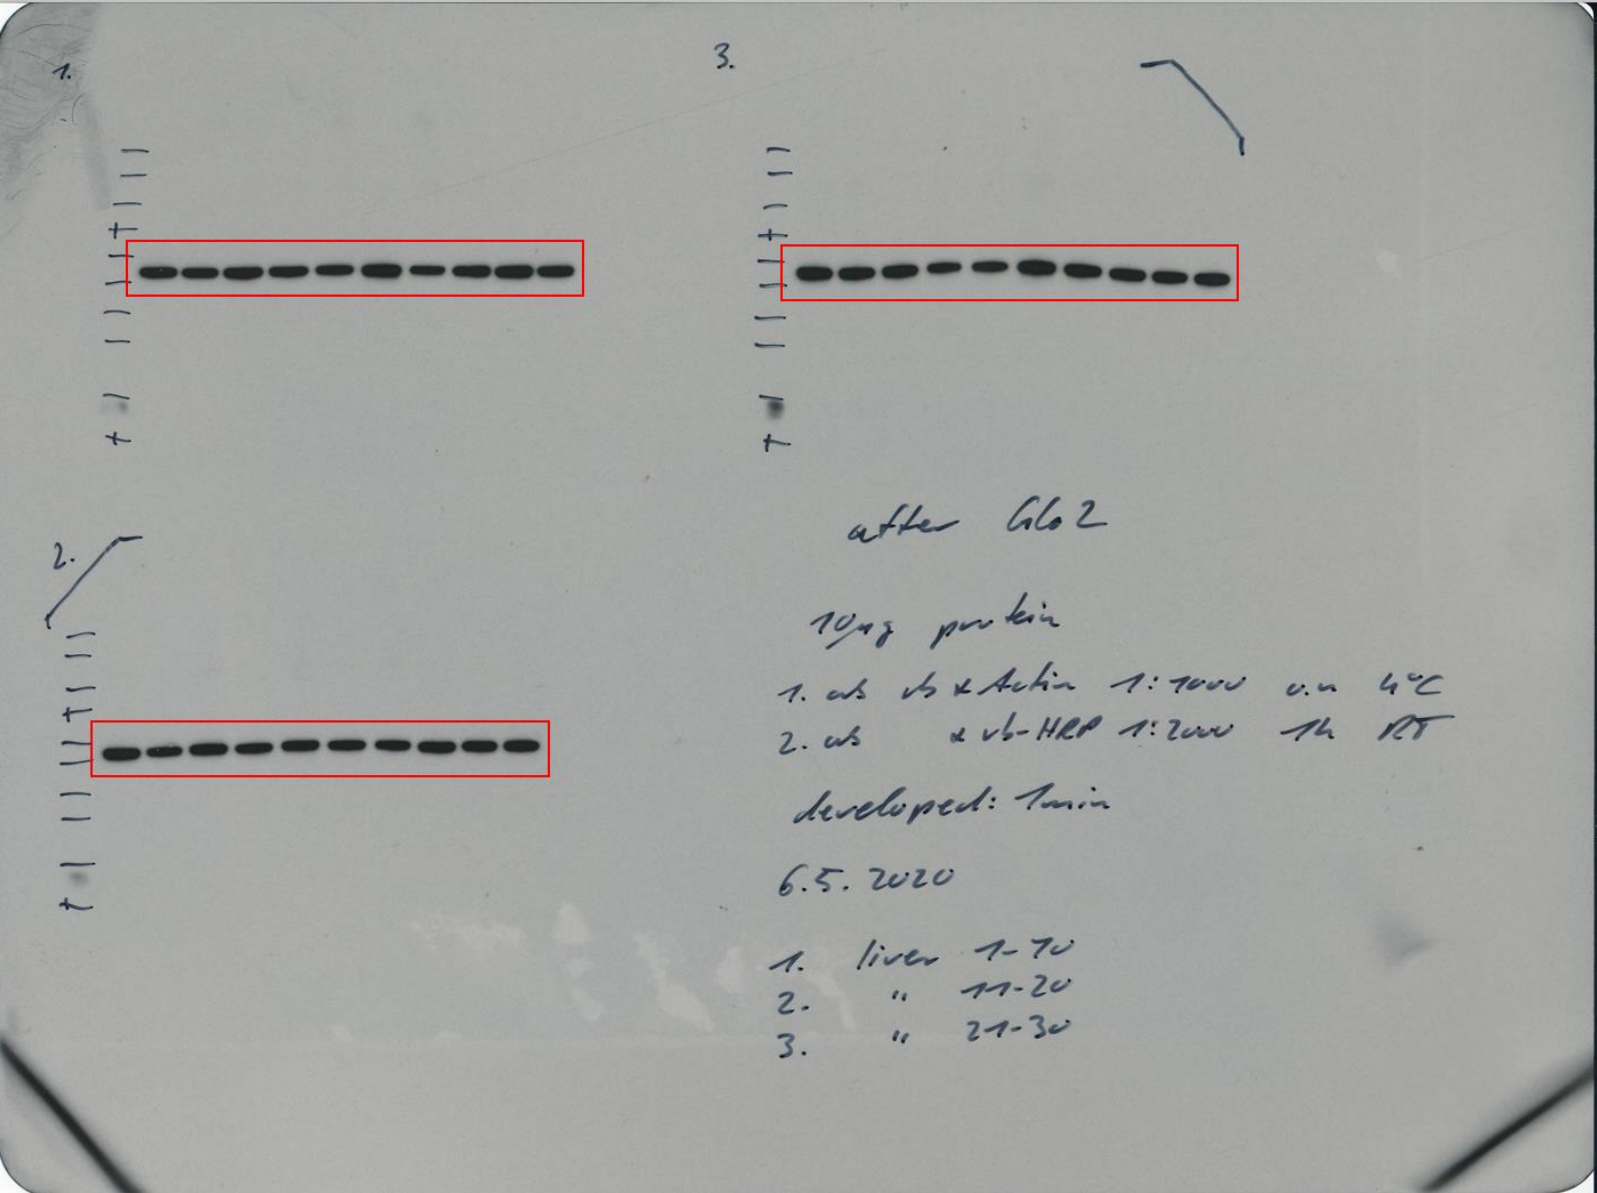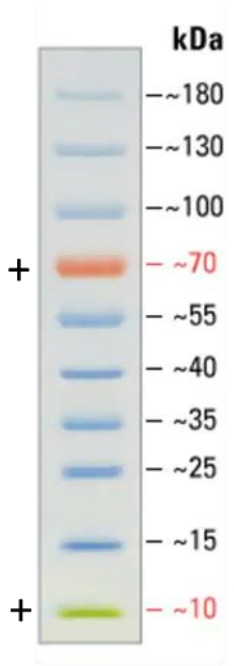

PageRuler™ Prestained Protein Ladder, 10 to 180 kDa (Thermo; 26616)

**Supplementary Figure 1E.** Summary of Western Blot Analysis for Glo1, Glo2 & Actin.

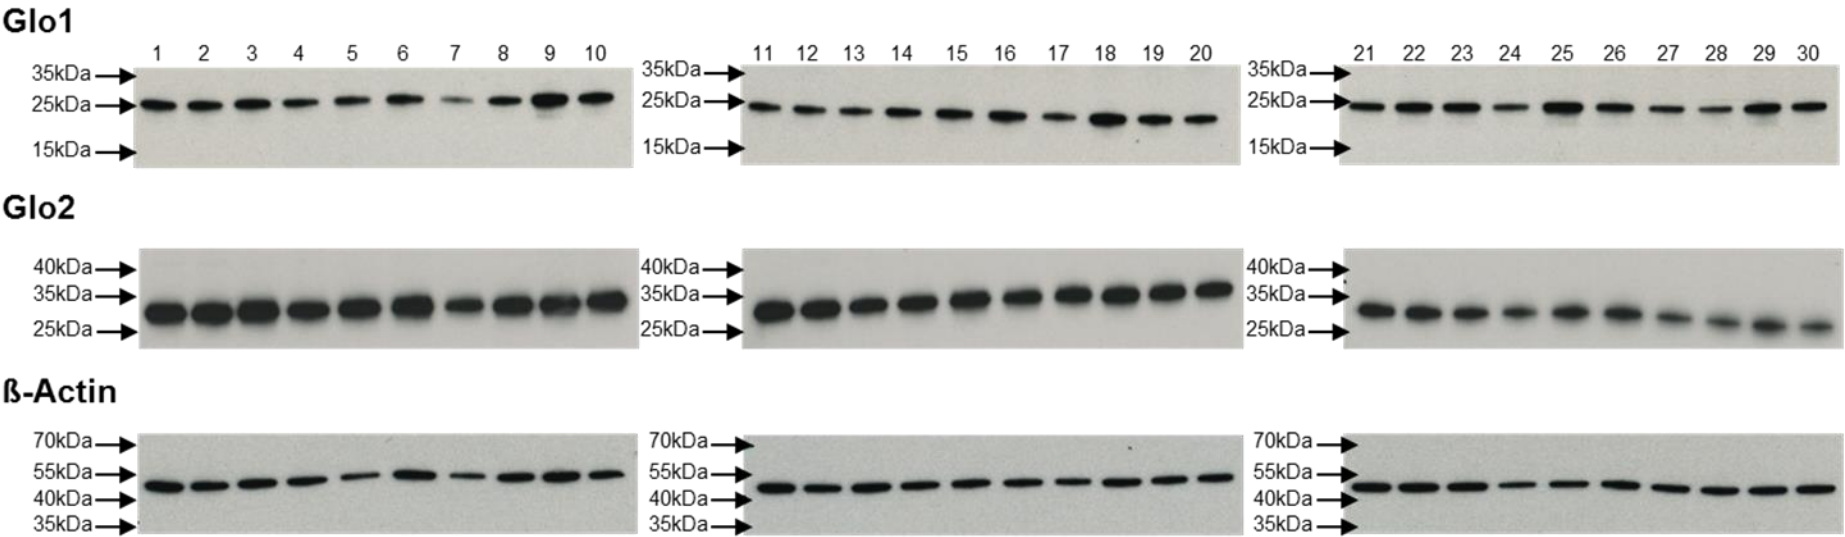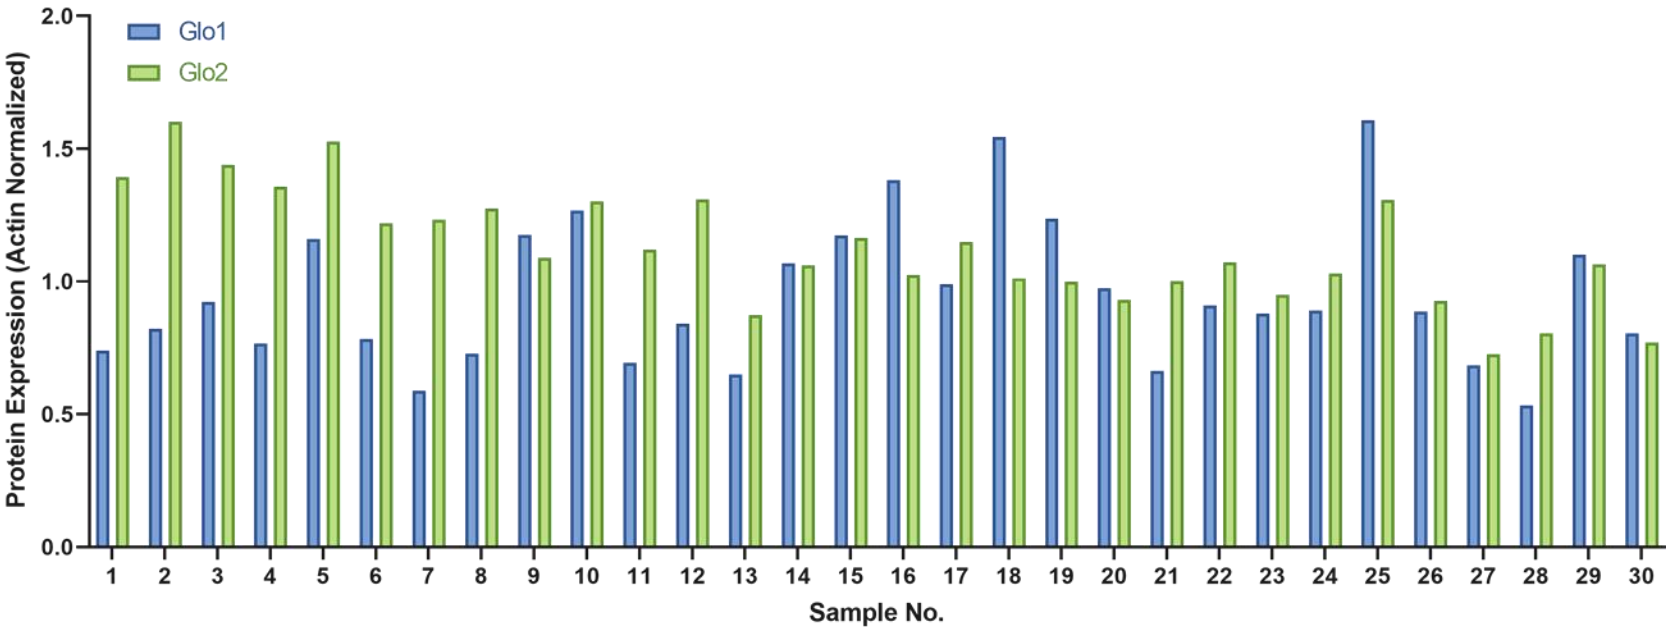

Supplement: s1 [file s1]
